# Supplementary material for: Diabetes-related symptoms, acute complications and management of diabetes mellitus of patients who are receiving palliative care: a protocol for a systematic review
Source: PubMed Central journal article supplement — BMJ Open. 2019 Jun 14;9(6):e028604. doi: 10.1136/bmjopen-2018-028604 (PMC6589017; doi:10.1136/bmjopen-2018-028604), 2019-06-14
Supplement: bmjopen-2018-028604supp001.pdf [file bmjopen-2018-028604supp001.pdf]

**Diabetes-related symptoms, acute complications and management of diabetes mellitus in palliative care: a systematic review.**

Search strategy for **PubMed**:

((((((((((diabetes mellitus[MeSH Terms]) OR diabet\*[Title/Abstract])) OR T1DM[Title/Abstract]) OR T2DM[Title/Abstract]) OR NIDDM[Title/Abstract]) OR IDDM[Title/Abstract]) OR "glucose lowering medicine\*[Title/Abstract]) OR hyperglycemia[MeSH Major Topic]) OR hyperglycemia\*[Title/Abstract]) AND (((((((palliative care[MeSH Major Topic]) OR terminal care[MeSH Major Topic]) OR palliative[Title/Abstract]) OR "terminal care"[Title/Abstract]) OR "supportive care"[Title/Abstract]) OR "Terminal patient" [Title/Abstract]) OR "terminal patients" [Title/Abstract]) OR "End of Life Care"[Title/Abstract]) OR "Terminal Phase"[Title/Abstract])
